# Supplementary material
Source: publisher site journal article supplement (https://www.dovepress.com/article/405463)
Supplement: Supplementary file 1 [file get_supplementary_file.php]

**Supplementary File 1**

Dear Sir/Madam,

Thank you for participating in this study on ‘*Decent Work*’. The following information will help you better understand the purpose of the research project, the procedures, the possible risks and inconveniences. If you have any questions, please contact the researchers.

**Research Topic**

Study on the relationship between decent work and workplace deviance.

**Researchers**

Fan Yafan, Deng Tongbo, Li Min

**Purpose of the study**

To understand the influence of decent work on workplace deviance and to explore how organizations should help employees relieve stress and avoid workplace deviance.

**Research process**

Questionnaire content: 1) decent work 2) work resources 3) workplace deviance

Questionnaire completion: electronic questionnaire was completed via the Internet

Times of questionnaire: two or more times

**Potential inconvenience and risk**

Potential inconvenience: Each questionnaire may take about 20 minutes to complete, and the questionnaire for this study will be administered in two or more sessions. We use electronic questionnaires to collect information from you, so you can fill out the questionnaire at any convenient time.

Possible risk: Some questions may be personal, you may check the privacy section below. You have the right to refuse to answer any questions related to your privacy during the questionnaire completion process.

**Confidentiality of personal information and data**

This study has been approved by the Ethics Committee of the School of Public Administration of South China University of Technology. Your participation in filling out personal information will be kept strictly confidential. Information about your identity will not be disclosed to members outside the study group unless your permission is obtained. Your data will be stored on a password-protected file and will only be accessible by the researchers. The data you fill in will only be used for the publication of this study and no personal information about you will appear in the paper.

**Contact information**

If you have any questions about the research or future research, please do not hesitate to contact us.

Contact: Fan Yafan

Email: pafanyafan@mail.scut.edu.cn

Thank you for your support and cooperation, best regards.

Yours sincerely,

All three researchers
